# Supplementary material for: Suppression of PTPN6 exacerbates aluminum oxide nanoparticle-induced COPD-like lesions in mice through activation of STAT pathway
Source: PubMed Central journal article supplement (PMC5728016; doi:10.1186/s12989-017-0234-0), 2017-12-12

Table S1 Primer sequences for qRT-PCR assays.

| <b>Gene symbol</b> | <b>Forward</b>              | <b>Reverse</b>              |
|--------------------|-----------------------------|-----------------------------|
| mMmp9              | 5'CTGGACAGCCAGACACTAAAG3'   | 5,CTCGCGGCAAGTCTTCAGAG3'    |
| mApp               | 5'TCCGAGAGGTGTGCTCTGAA3'    | 5'CCACATCCGCCGTAAAAGAATG3'  |
| mPtpn6             | 5'GGACTTCTATGACCTGTACGGA3'  | 5'GCTGCGTGTAATACTCGACCA3'   |
| mPdcd4             | 5'CCACTGACCCTGACAATTTAAGC3' | 5'TTTTCCGCAGTCGTCTTTTGG3'   |
| mBax               | 5'TGAAGACAGGGGCCTTTTTG3'    | 5'AATTCGCCGGAGACACTCG3'     |
| mCypa              | 5'GAGCTGTTTGCAGACAAAGTTC3'  | 5'CCCTGGCACATGAATCCTGG3'    |
| hBAX               | 5'CCCGAGAGGTCTTTTTCCGAG3'   | 5'CCAGCCCATGATGGTTCTGAT3'   |
| hAPP               | 5'TCTCGTTCCTGACAAGTGCAA3'   | 5'GCAAGTTGGTACTCTTCTCACTG3' |
| hPTPN6             | 5'TGAACTGCTCCGATCCCACTA3'   | 5'CACGCACAAGAAACGTCCAG3'    |
| hPDCD4             | 5'ACAGGTGTATGATGTGGAGGA3'   | 5'TTCTCAAATGCCCTTTCATCCAA3' |
| hCYPA              | 5'CCCACCGTGTTCTTCGACATT3'   | 5'GGACCCGTATGCTTTAGGATGA3'  |

**Figure S1 Gene expression levels in A549 cells.**

A: ZnO NPs exposed-lung tissues showed thickened alveolar walls and emphysema.

B: A549 cells exposed to ZnO NPs with concentration of 0, 25, or 100  $\mu\text{g}/\text{mL}$  for 24h.

C: A549 cells exposed to CB NPs with concentration of 0, 25, or 100  $\mu\text{g}/\text{mL}$  for 24h.

D: Gene expression levels in murine lung tissues exposed to ZnO NPs.

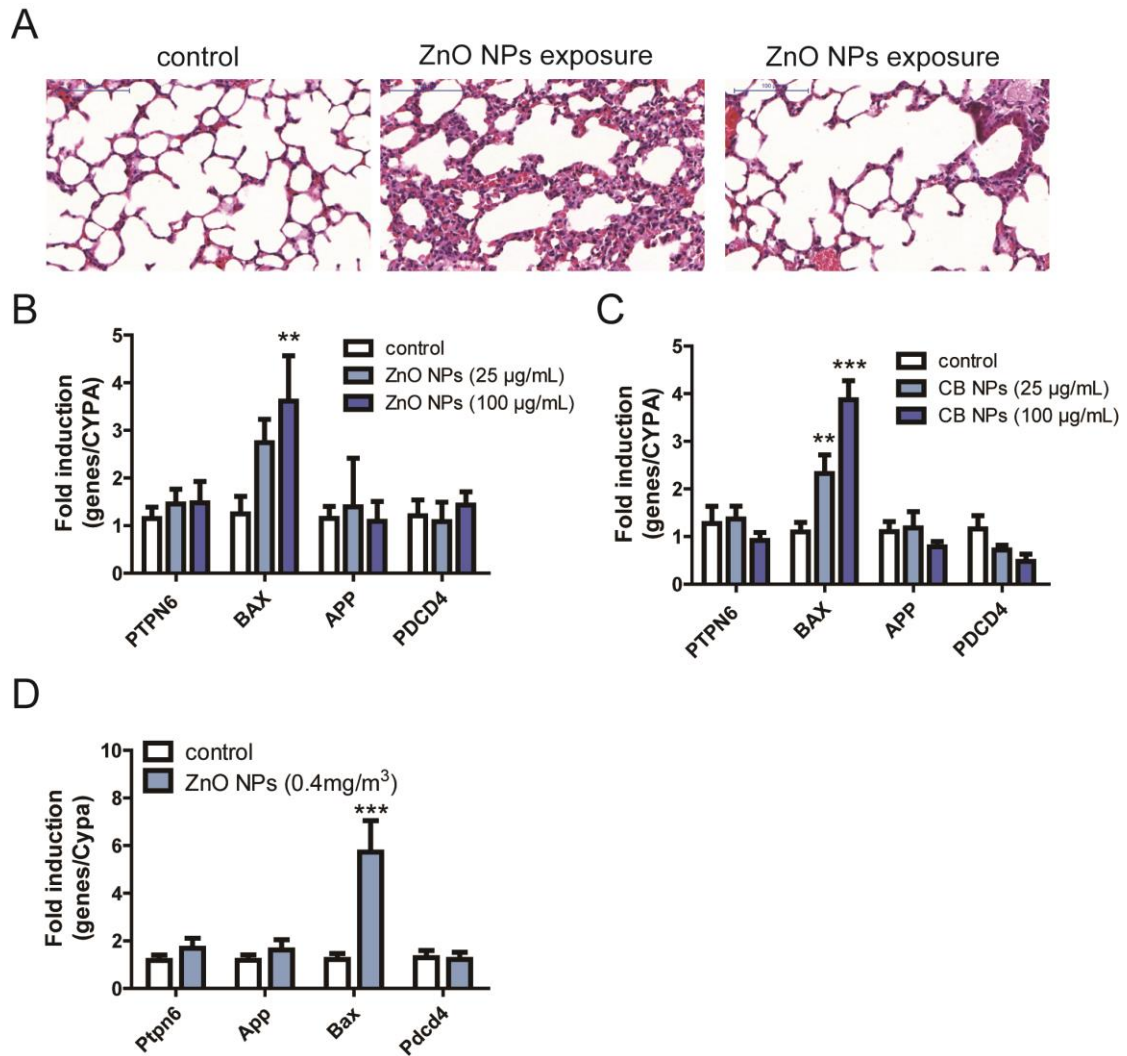

**Figure S2 Expression of PTPN6 in mouse lungs following intranasal instillation of PTPN6 expression lentivirus**

A: small airway, B: alveolar areas

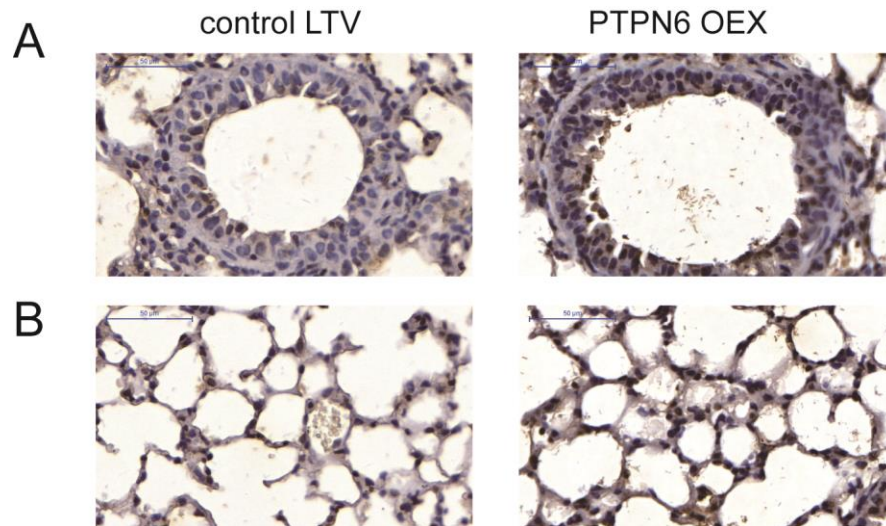

**Figure S3 Representative images of negative control for PDCD4 IHC staining.**

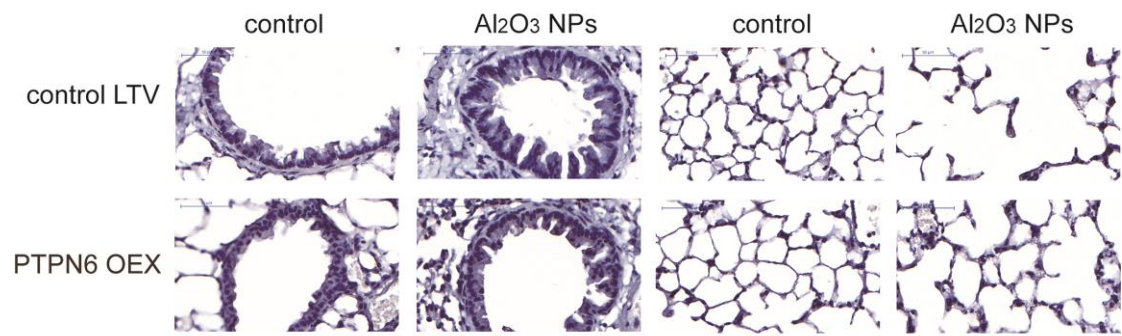

**Figure S4** The particle size distribution and aggregation size of nanomaterials suspending in DMEM medium (10% FBS).

A: Particle size distribution of Al<sub>2</sub>O<sub>3</sub> NPs at concentration of 25 µg/mL in DMEM medium (10% FBS). B: Aggregation of Al<sub>2</sub>O<sub>3</sub> NPs in DMEM medium (10% FBS). C: Particle size distribution of ZnO NPs at concentration of 25 µg/mL in DMEM medium (10% FBS). D: Aggregation of ZnO NPs in DMEM medium (10% FBS). E: Particle size distribution of CB NPs at concentration of 25 µg/mL in DMEM medium (10% FBS). F: Aggregation of CB NPs in DMEM medium (10% FBS).

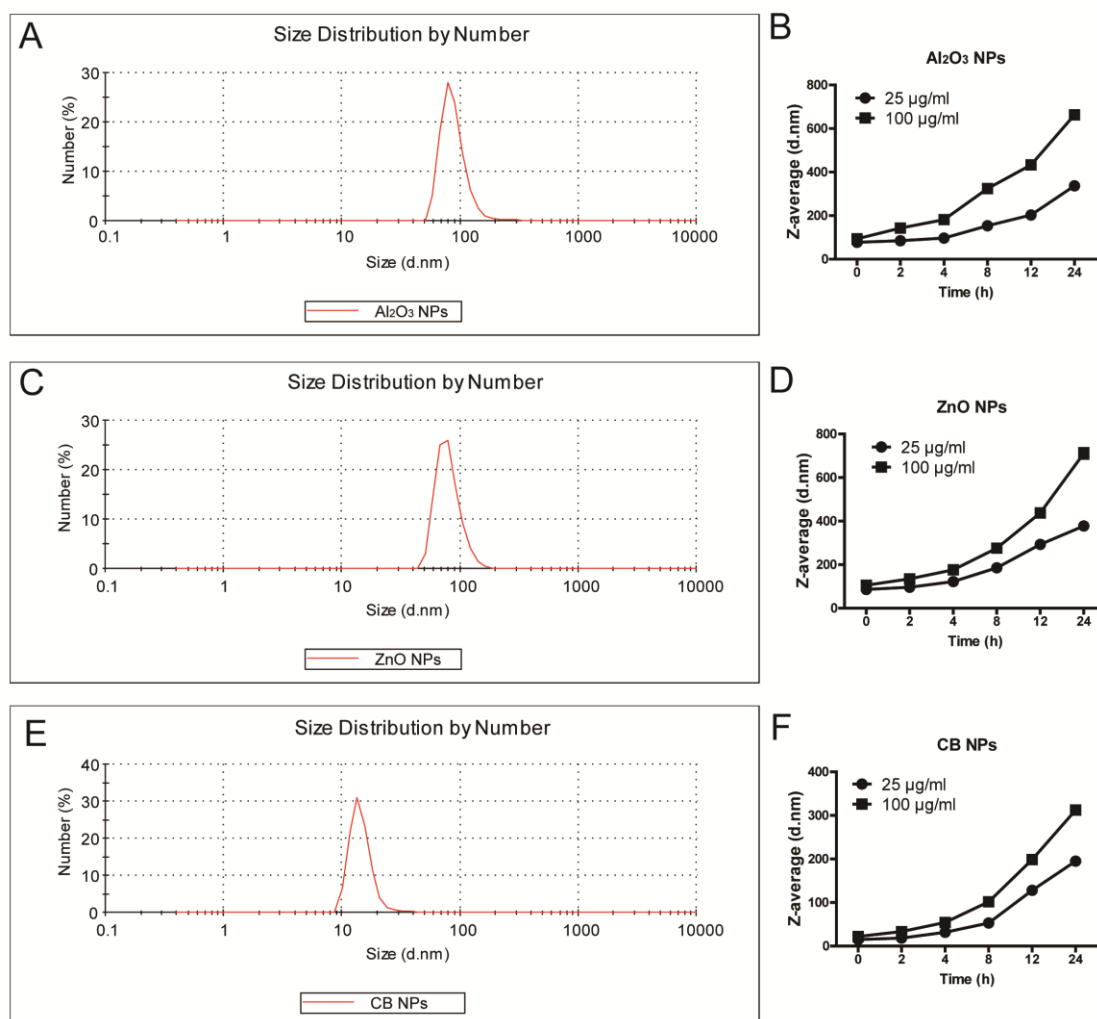

Supplement: 12989_2017_234_MOESM1_ESM.pdf [file 12989_2017_234_MOESM1_ESM.pdf]
